# Supplementary material
Source: bioRxiv or medRxiv preprint supplement (https://www.biorxiv.org/highwire/filestream/96629/field_highwire_adjunct_files/4/314922-13.pdf)
Supplement: Supplementary file [file 314922-13.pdf]

| Compound [# of native carbons in fragment]                | <i>Fraction of [+X] fragment (n = 3, biological) at given TI feedrate</i> |          |               |           |               |          |               |           |
|-----------------------------------------------------------|---------------------------------------------------------------------------|----------|---------------|-----------|---------------|----------|---------------|-----------|
|                                                           | 0 mmol/g/h                                                                |          | 0.06 mmol/g/h |           | 0.12 mmol/g/h |          | 0.18 mmol/g/h |           |
| <i>Class 1<sup>+</sup> - Non-accumulating amino acids</i> |                                                                           |          |               |           |               |          |               |           |
| Alanine [3]                                               | 0.002                                                                     | ± 0.002  | 0.025         | ± 0.003   | 0.058         | ± 0.007  | 0.060         | ± 0.003   |
| Aspartate [4]                                             | 0                                                                         | ± 0      | 0.014         | ± 0.001   | 0.038         | ± 0.001  | 0.060         | ± 0.003   |
| Glutamate [5]                                             | 0.0006                                                                    | ± 0.0001 | 0.017         | ± 0.001   | 0.039         | ± 0.001  | 0.065         | ± 0.002   |
| Glycine [2]                                               | 0.0013                                                                    | ± 0.0007 | 0.022         | ± 0.001   | 0.04          | ± 0.01   | 0.070         | ± 0.003   |
| Proline [4]                                               | 0.0005                                                                    | ± 0.0003 | 0.0061        | ± 0.0002  | 0.013         | ± 0.001  | 0.018         | ± 0.001   |
| Serine [2]                                                | 0.001                                                                     | ± 0.001  | 0.026         | ± 0.002   | 0.039         | ± 0.008  | 0.057         | ± 0.002   |
| Threonine [4]                                             | 0                                                                         | ± 0      | 0.008         | ± 0.001   | 0.022         | ± 0.002  | 0.039         | ± 0.004   |
| <i>Class 2<sup>+</sup> - Accumulating amino acids</i>     |                                                                           |          |               |           |               |          |               |           |
| Isoleucine [5]                                            | 0.003                                                                     | ± 0.001  | 0.003         | ± 0.001   | 0.006         | ± 0.003  | 0.00013       | ± 0.00001 |
| Leucine [5]                                               | <i>[+5] not detected</i>                                                  |          |               |           |               |          |               |           |
| Lysine [5]                                                | <i>[+5] not detected</i>                                                  |          |               |           |               |          |               |           |
| Methionine [4]                                            | <i>[+4] not detected</i>                                                  |          |               |           |               |          |               |           |
| Phenylalanine [8]                                         | <i>[+8] not detected</i>                                                  |          |               |           |               |          |               |           |
| Tyrosine [9]                                              | <i>[+9] not detected</i>                                                  |          |               |           |               |          |               |           |
| Valine [4]                                                | 0.002                                                                     | ± 0.001  | 0.0010        | ± 0.0002  | 0.002         | ± 0.001  | 0.008         | ± 0.002   |
| Glycogen [5]                                              | 0.0004                                                                    | ± 0.0001 | 0.00028       | ± 0.00002 | 0.0007        | ± 0.0003 |               |           |
